# Supplementary material for: A genetic approach for analyzing the co-operative function of the tRNA mimicry complex, eRF1/eRF3, in translation termination on the ribosome
Source: PubMed Central journal article supplement (PMC4081094; doi:10.1093/nar/gku493), 2014-06-09

## Supplementary

### **A Genetic Approach for Cooperative Function of tRNA Mimicry Complex, eRF1/eRF3 in translation termination on the Ribosome**

Miki Wada<sup>1,2</sup> and Koichi Ito<sup>2,\*</sup>

<sup>1</sup> Technical office, The Institute of Medical Science, The University of Tokyo, Minato-ku, Tokyo, 108-8639, Japan

<sup>2</sup> Department of Medical Genome Sciences, Graduate School of Frontier Sciences, The University of Tokyo, Kashiwa-city, Chiba, 277-8562, Japan

\* To whom correspondence should be addressed. Tel: +81 4 7136 3600; Fax: +81 4 7136 3601; Email: itokoichi@k.u-tokyo.ac.jp

## SUPPLEMENTARY TABLE AND FIGURES LEGENDS

Table S1. List of *S. cerevisiae* strains used in this study.

Table S2. List of vectors and plasmids used in this study.

Table S3. List of primers used in this study.

### Figure S1

A) Schematic drawing of domain structures and conserved regions between Pc-eRF3 and aEF1 $\alpha$ . The conserved G-domain motifs are shown as black squares according to ref. 11.

B) Sequence alignment of Pc-eRF3 and its homologs. Muscle (67, 68) and ESPript (<http://espript.ibcp.fr/ESPript/ESPript/index.php>) (69) programs were used to generate the alignment with secondary structure of aEF1 $\alpha$ . Sc-eRF3: *Saccharomyces cerevisiae* eRF3, Sp-eRF3: *Schizosaccharomyces pombe* eRF3, Hs-eRF3: human GSPT1, Ap-eRF1a: *Aeropyrum pernix* EF1 $\alpha$ , Ec-EFTu: *E. coli* EF-Tu, Ta-EFTu: *Thermus aquaticus* EF-Tu. The Pc-eRF3 mutation sites identified in this study are indicated by triangles.

### Figure S2

Sequence alignment of Sc-eRF1 and its homologs. Muscle (67, 68) and ESPript (<http://espript.ibcp.fr/ESPript/ESPript/index.php>) (69) programs were used to generate the alignment and secondary structure prediction. Sp: *Schizosaccharomyces pombe*, Hs: human, aRF1: *Aeropyrum pernix* aRF1. The Sc-eRF1 cooperative mutation sites identified in this study are indicated by triangles.

### Figure S3

Complementation analysis of eRF3 temperature sensitive strain (eRF3ts) of *S. cerevisiae* (YK21-02). Growth of the eRF3ts strain that had been transformed with the Pc-eRF3-mutant plasmids at restrictive temperature, 37°C, is shown. (-: no growth, +: weak growth, ++: good growth)

### Figure S4

Yeast two-hybrid binding assay of Pc-eRF3c mutants against Sc-eRF1. Binding domain vector pGBT9 alone, or fused to Sc-eRF3c, Pc-eRF3c<sup>wt</sup>, or its mutant genes were introduced into the AH109 strain together with pGAD424-Sc-eRF1, and growth of the transformants were examined on selection plates. (-: no binding, +: weak binding, ++: good binding) This figure is complete

data set of Figure 2B.

#### Figure S5

Complementation analysis of the double tet-OFF strain of *S. cerevisiae* (Y138) by Pc-eRF3c mutants. p416GPD vector, p416GPD-Sc-eRF3c, p416GPD-Pc-eRF3c<sup>wt</sup> and its mutants were introduced into Y138 in combination with p414GPD-Sc-eRF1, and growth of the transformants were examined in the presence of 7.5 µg/ml doxycycline. (-: no growth, +: weak growth, ++: good growth)

#### Figure S6

Yeast two-hybrid binding assay of Sc-eRF1 mutants against Pc-eRF3c<sup>wt</sup>. Activation domain vector pGAD424 alone, or fused to Sc-eRF1 or its mutant genes were introduced into the AH109 strain together with pGBT9-Pc-eRF3c<sup>wt</sup>, and growth of the transformants were examined on selection plates. (-: no binding, +: weak binding, ++: good binding) . This figure is complete data set of Figure 4C.

### SUPPLEMENTARY REFERENCES

67. Edgar, R.C. (2004) MUSCLE: multiple sequence alignment with high accuracy and high throughput. *Nucleic Acids Res.* **32**(5):1792-1797.
68. Edgar, R.C. (2004) MUSCLE: a multiple sequence alignment method with reduced time and space complexity. *BMC Bioinformatics*, **(5)** 113.
69. Gouet, P., Robert, X. and Courcelle E. (2003) "ESPrpt/ENDscript: extracting and rendering sequence and 3D information from atomic structures of proteins". *Nucl. Acids Res.* **31**(13), 3320-3323
70. Kikuchi, Y., Shimatake, H. and Kikuchi, A. (1988) A yeast gene required for the G1-to-S transition encodes a protein containing an A-kinase target site and GTPase domain. *Embo J*, **7**, 1175-1182.
71. Mumberg, D., Muller, R. and Funk, M. (1995) Yeast vectors for the controlled expression of heterologous proteins in different genetic backgrounds. *Gene*, **156**, 119-122.
72. Fields, S. and Song, O. (1989) A novel genetic system to detect protein-protein interaction. *Nature* **340**, 245-246.

Table S1. Yeast strains

|         |                                                                                                                                                                                                                                                                                     |           |
|---------|-------------------------------------------------------------------------------------------------------------------------------------------------------------------------------------------------------------------------------------------------------------------------------------|-----------|
| Y40     | MAT $\alpha$ <i>ade2D::hisG his3D200 leu2D0 lys2D0 met15D0 trp1D63 ura3D0 SUP35::HIS3</i><br>HO::tTA-tetO (YDR172W/SUP35):: kanMX4                                                                                                                                                  | This work |
| YK21-02 | MAT $\alpha$ <i>gst1-1(sup35ts)</i>                                                                                                                                                                                                                                                 | (70)      |
| Y138    | MAT $\alpha$ <i>ade2D::hisG his3D200 leu2D0 lys2D0 met15D0 trp1D63 ura3D0 SUP35::HIS3</i><br>HO::tTA-tetO (YDR172W/SUP35):: kanMX4 tTA-tetO (YBR143C/SUP45)::hphMX4                                                                                                                 | This work |
| Y133    | MAT $\alpha$ <i>can1-100 ade2-101 his3<math>\Delta</math>200 leu2<math>\Delta</math>0 lys2<math>\Delta</math>0 met15<math>\Delta</math>0 trp1<math>\Delta</math>63 ura3<math>\Delta</math>0</i><br><i>sal2(sup35ts) HO::Rluc-[UGA]-Luc2</i>                                         | This work |
| Y134    | MAT $\alpha$ <i>can1-100 ade2-101 his3<math>\Delta</math>200 leu2<math>\Delta</math>0 lys2<math>\Delta</math>0 met15<math>\Delta</math>0 trp1<math>\Delta</math>63 ura3<math>\Delta</math>0</i><br><i>sal2(sup35ts) HO::Rluc-[UGG]-Luc2</i>                                         | This work |
| S13-I01 | MAT $\alpha$ <i>ura3-1 ade2-1 leu2-3,112 sal4-2 (sup45ts) HO::Rluc-[UAA]-Luc2</i>                                                                                                                                                                                                   | (47)      |
| S13-I03 | MAT $\alpha$ <i>ura3-1 ade2-1 leu2-3,112 sal4-2 (sup45ts) HO::Rluc-[UAG]-Luc2</i>                                                                                                                                                                                                   | (47)      |
| S13-I05 | MAT $\alpha$ <i>ura3-1 ade2-1 leu2-3,112 sal4-2 (sup45ts) HO::Rluc-[UGA]-Luc2</i>                                                                                                                                                                                                   | (47)      |
| S13-I07 | MAT $\alpha$ <i>ura3-1 ade2-1 leu2-3,112 sal4-2 (sup45ts) HO::Rluc-[UGG]-Luc2</i>                                                                                                                                                                                                   | (47)      |
| AH109   | MAT $\alpha$ <i>trp1-901 leu2-3 112 ura3-52 his3-200 gal4<math>\Delta</math> gal80<math>\Delta</math></i><br><i>LYS2::GAL1<sub>UAS</sub>-GAL1<sub>TATA</sub>-HIS3</i><br><i>GAL2<sub>UAS</sub>-GAL2<sub>TATA</sub>-ADE2 URA3::MEL1<sub>UAS</sub>-MEL1<sub>TATA</sub>-lacZ, MEL1</i> | CLONTECH  |

Table S2. Vectors and plasmids

| <i>S. cerevisiae</i> expression vectors |                                                               |                    |
|-----------------------------------------|---------------------------------------------------------------|--------------------|
| P416CYC                                 | CYC promoter CEN6/ARSH4 URA3                                  | (71)               |
| P416GPD                                 | GPD promoter CEN6/ARSH4 URA3                                  | (71)               |
| P414CYC                                 | CYC promoter CEN6/ARSH4 TRP1                                  | (71)               |
| P414GPD                                 | GPD promoter CEN6/ARSH4 TRP1                                  | (71)               |
| p416GPD-FLAG                            | p416GPD vector containing FLAG-tag gene for N-terminal fusion | This study         |
| p416CYC-FLAG                            | p416CYC vector containing FLAG-tag gene for N-terminal fusion | This study<br>(72) |
| pGAD424                                 | Two-hybrid DNA activation domain vector, GAL4AD (aa768-881)   | CLONTECH<br>(72)   |
| pGBT9                                   | Two-hybrid DNA binding domain vector, GAL4BD (aa1-147)        | CLONTECH           |

  

| plasmids                         |                                                             |  |
|----------------------------------|-------------------------------------------------------------|--|
| p416GPD-full-length Pc-eRF3      | Pc-eRF3 coding gene (nt 1-1890) in p416GPD                  |  |
| p416GPD-Pc-eRF3c                 | Pc-eRF3 coding gene (nt 592-1890) with ATG codon in p416GPD |  |
| p416CYC-Sc-eRF3c                 | Sc-eRF3 coding gene (nt 760-2058) in p416CYC                |  |
| p416GPD-Sc-eRF3c                 | Sc-eRF3 coding gene (nt 760-2058) in p416GPD                |  |
| p416GPD-FLAG-full-length Pc-eRF3 | Pc-eRF3 coding gene (nt 1-1890) in p416GPD-FLAG             |  |
| p416GPD-FLAG-Pc-eRF3c            | Pc-eRF3c coding gene (nt 592-1890) in p416GPD-FLAG          |  |
| p416CYC-FLAG-Sc-eRF3c            | Sc-eRF3c coding gene (nt 592-1890) in p416CYC-FLAG          |  |
| p414GPD-Sc-eRF1                  | Sc-eRF1 in p414GPD                                          |  |
| p416CYC-Sc-eRF1                  | Sc-eRF1 in p416CYC                                          |  |
| pGBT9-Pc-eRF3c                   | Pc-eRF3c coding gene (nt 592-1890) in pGBT9                 |  |
| pGBT9-Pc-eRF3 $\Delta$ 1         | Pc-eRF3 coding gene (nt 1294-1890) in pGBT9                 |  |
| pGBT9-Pc-eRF3c K349A             | Pc-eRF3 coding gene (nt 592-1890) K349A in pGBT9            |  |
| pGBT9-Sc-eRF3c                   | Sc-eRF3 coding gene (nt 760-2058) in pGBT9                  |  |
| pGAD424-Sc-eRF1                  | Sc-eRF1 in pGAD424                                          |  |

Table S3. Primers

---

P363 5' -GGGATCCATATGAATTCAGAGGCAAACAACAGTGA-3'

P318 5' -GGGTCGACCTACTCCTCGGAGATAAGTT-3'

P362 5' -GGGATCCATATGTATGGAAAAGAACACGTAAATG-3'

P555 5' -GGGATCCATATGCCATTAATCATTCTATTCA-3'

---

P549 5' -ATTGTAGCAATTAATGCAATGGATGATCCTAC-3'

P550 5' -GTAGGATCATCCATTGCATTAATTGCTACAAT-3'

---

P291 5' -GGGATCCATATGTTTGGTGGTAAAGATCAC-3'

P292 5' -GGCTCGAGTTACTCGGCAATTTTAACAAT-3'

---

P289 5' -GGGATCCATATGGATAACGAGGTTGAAAAA-3'

P306 5' -GGGTCGACTTAAATGAAATCATAGTCAGATCC-3'

---

P420 5' -GGTCTAGAACTAGTCCATGGACTACAAAGACGATG-3'

P421 5' -GGGGATCCTGTCGTCATCGTCTTTGTAGTCCATGG-3'

---

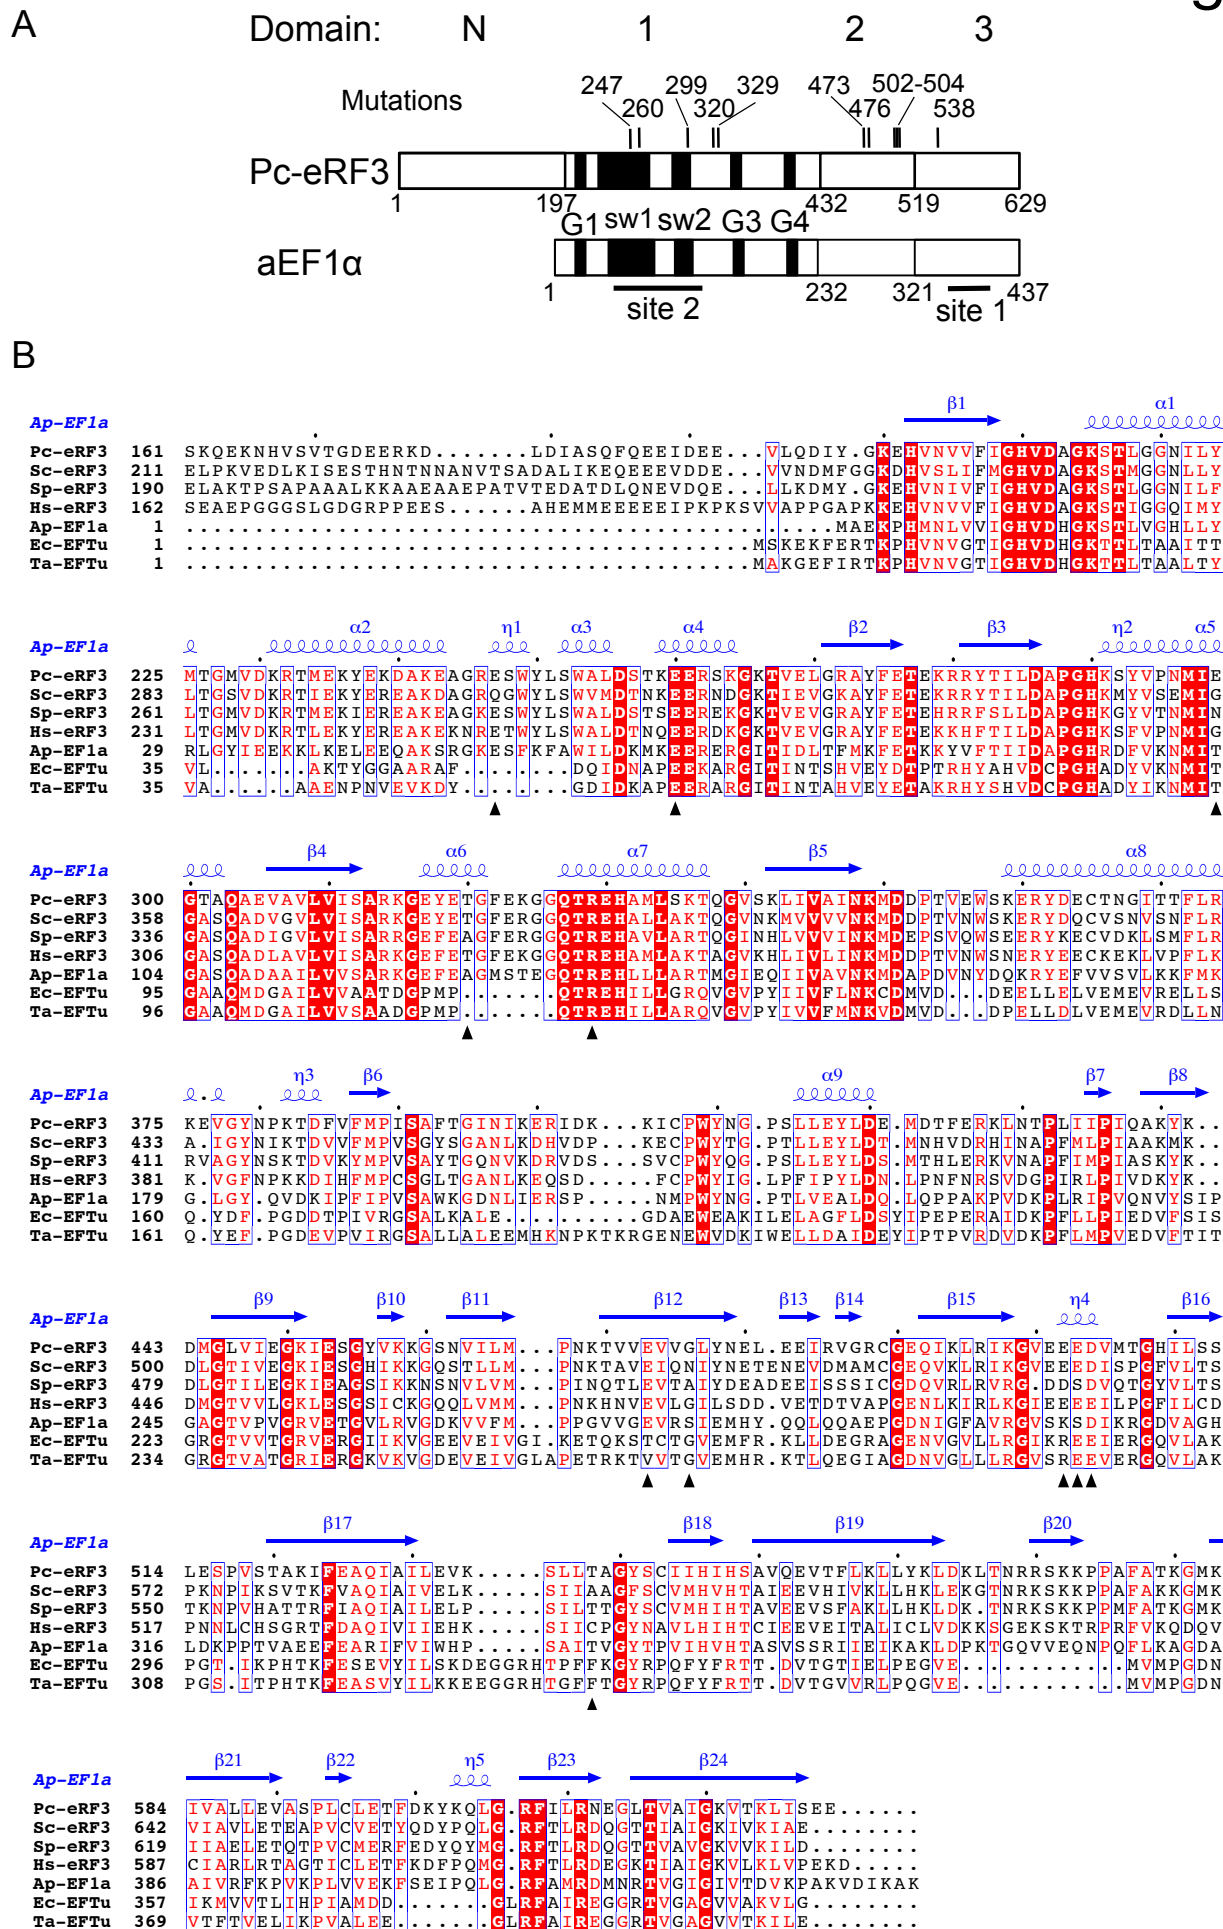

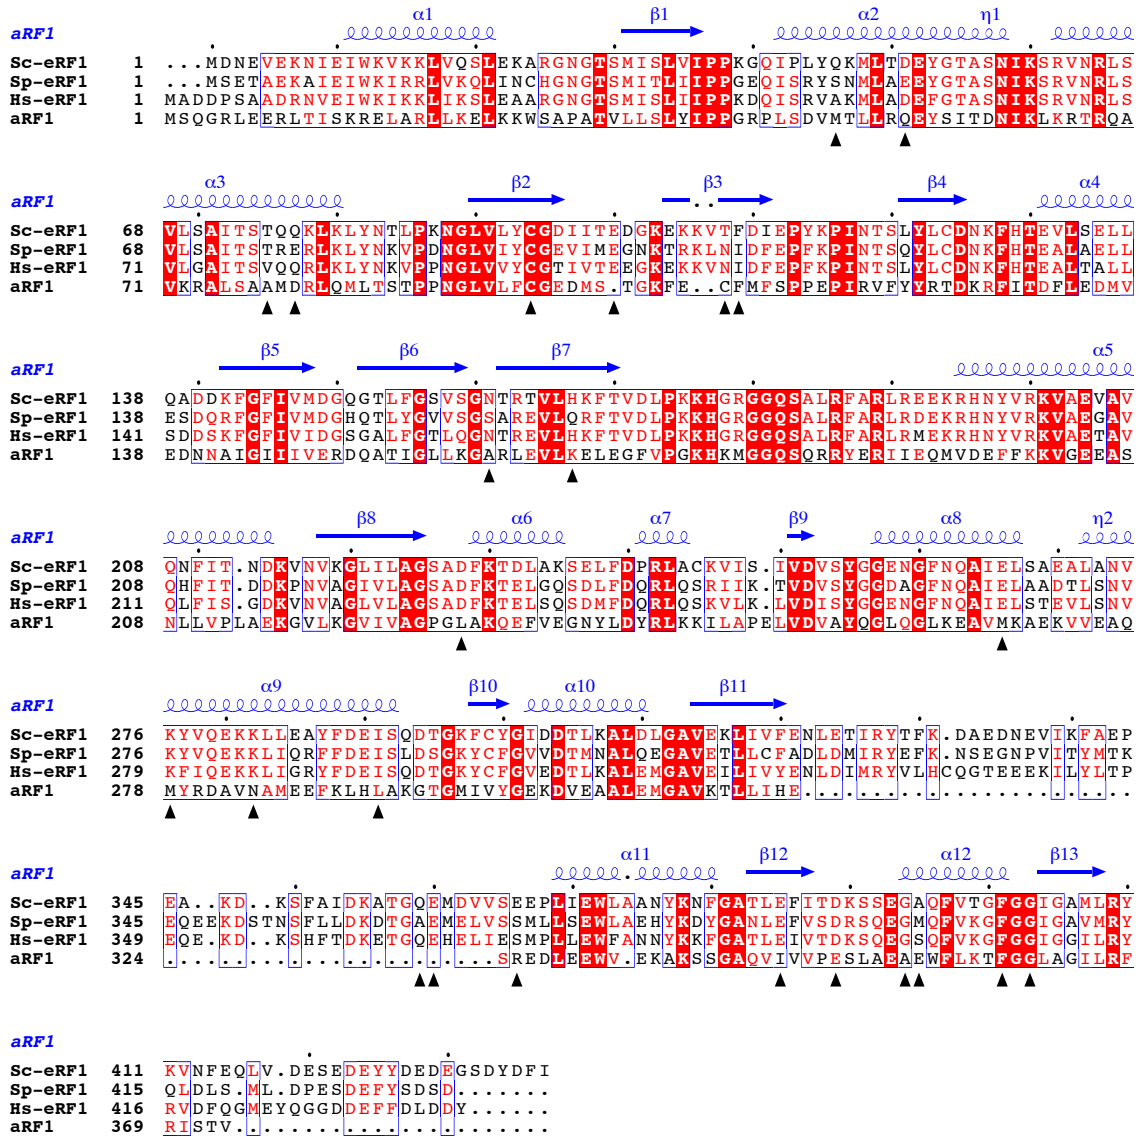



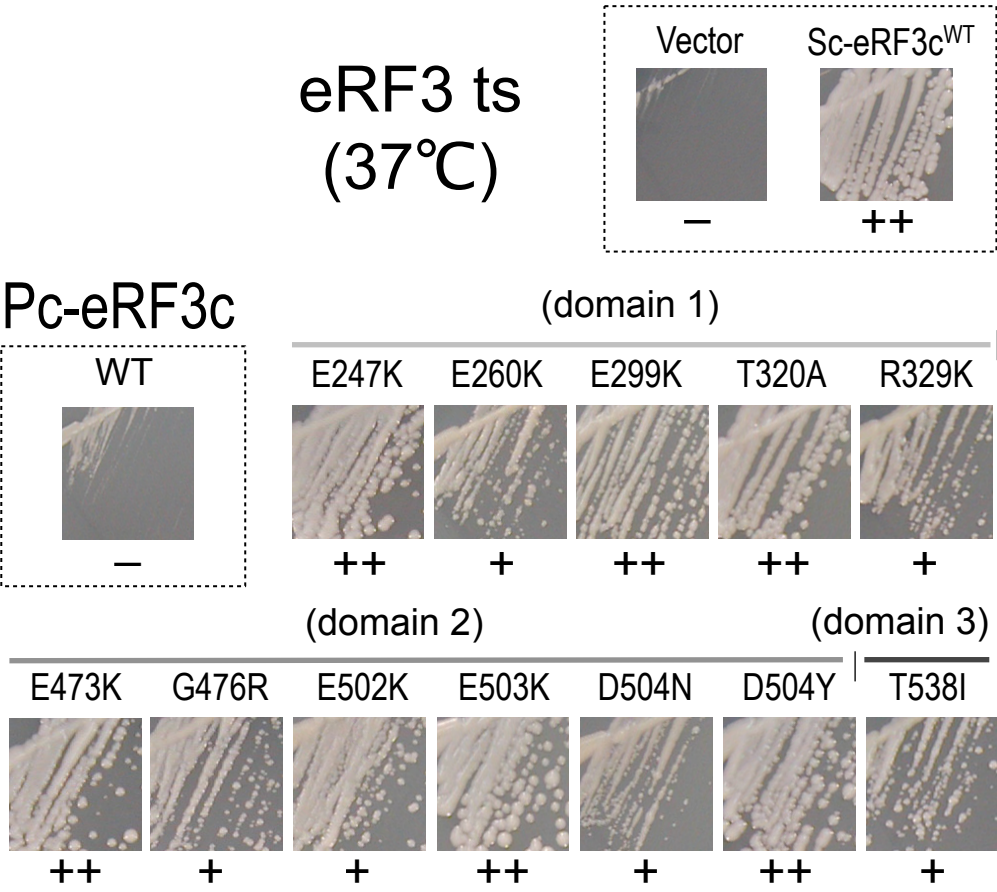

Figure S4

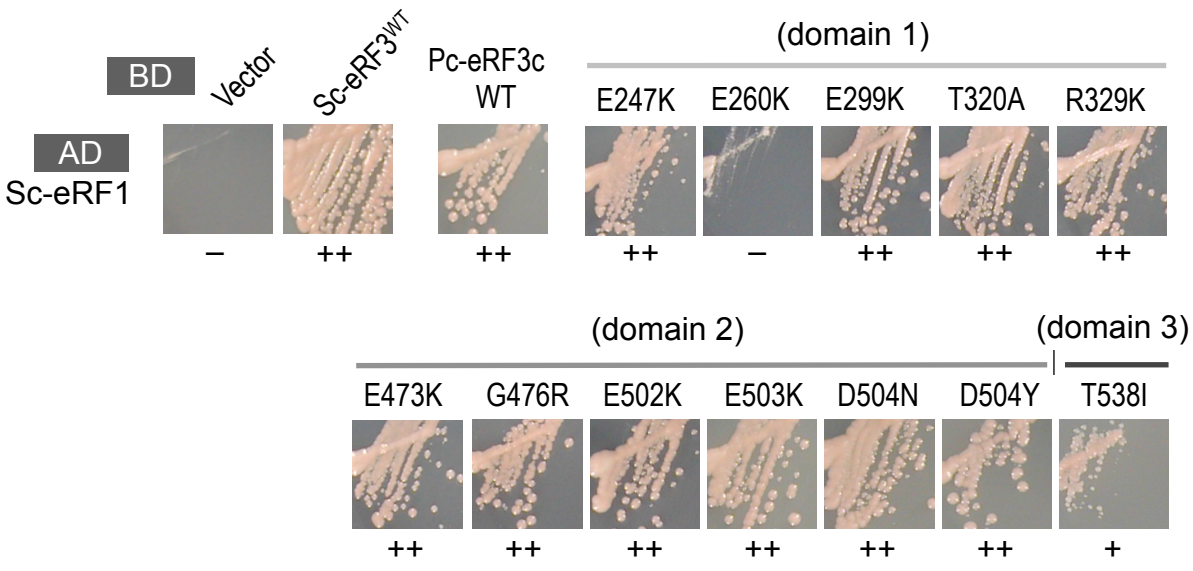

double tet-OFF  
(Dox 7.5  $\mu$ g/ml)  
+ Sc-eRF1<sup>WT</sup>

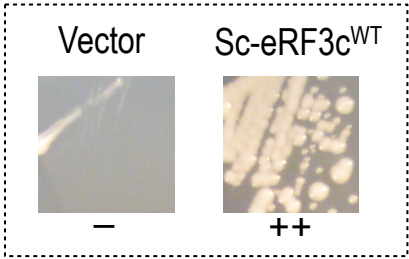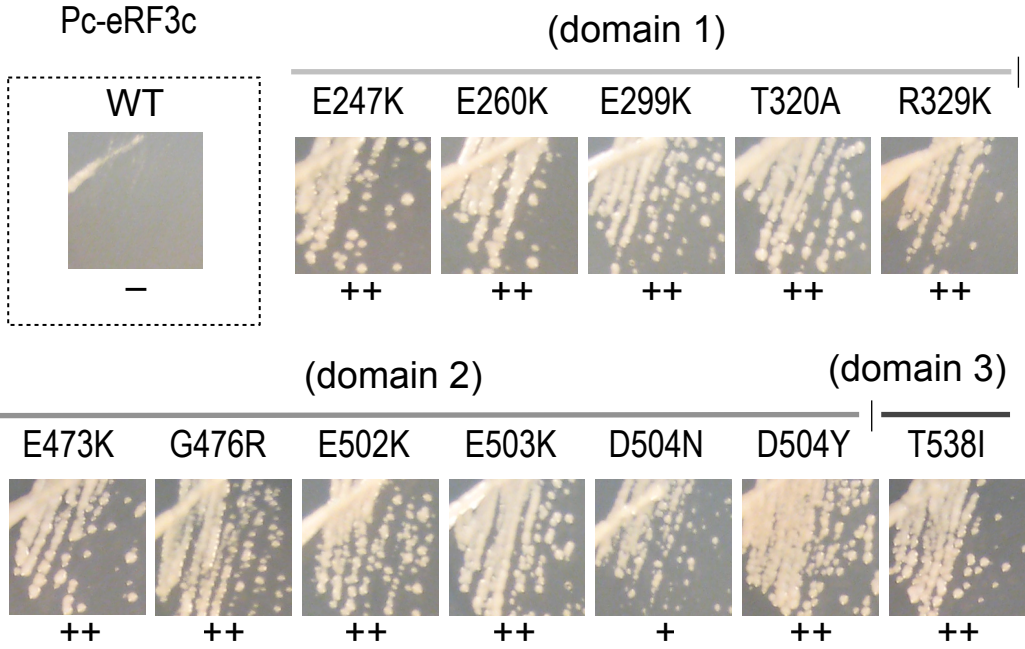

Figure S6

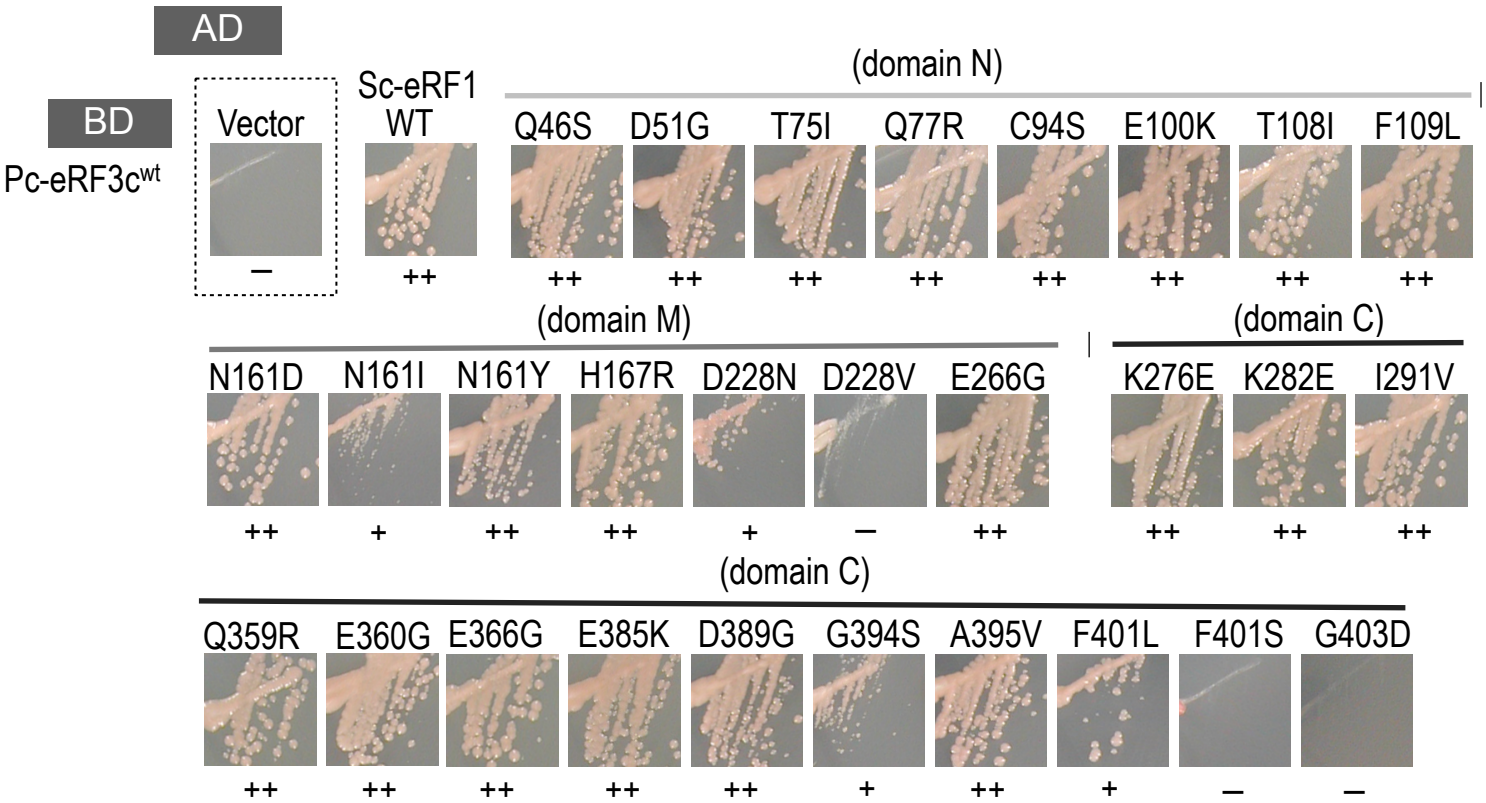

Supplement: supp_gku493_nar-00844-r-2014-File009.pdf [file supp_gku493_nar-00844-r-2014-File009.pdf]
